# Supplementary material
Source: HighWire-hosted journal article supplement (https://jitc.bmj.com/content/12/11/e009693)
Supplement: inline-supplementary-material-3 [file inline-supplementary-material-3.pdf]

# Mutation-guided chemotherapy-free strategy in first-line immunotherapy for low PD-L1-expressing non-squamous NSCLC

## Treatment-naïve advanced nsqNSCLCs

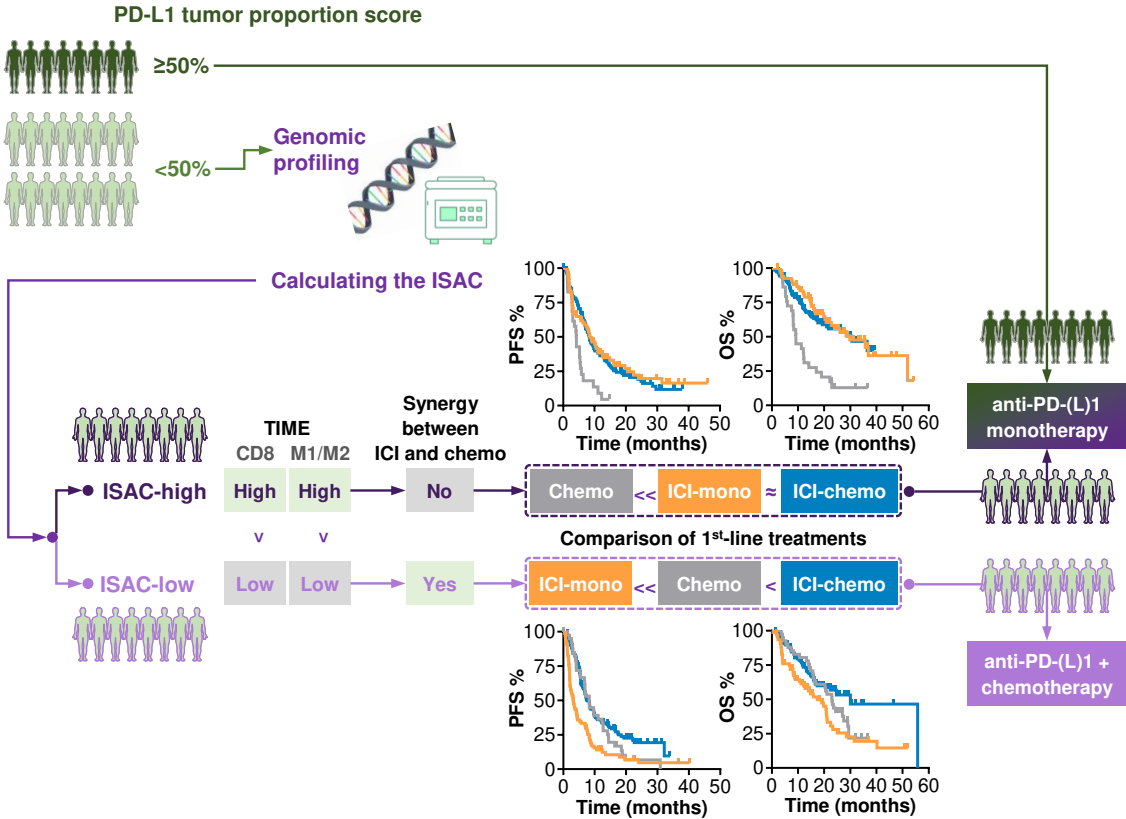

## Authors

Hui Li, Jingjing Liu, Liang Zhang, Yu Xu, Xinyue Wang, Shaowei Lan, Peng Cui, Guoqiang Wang, Shangli Cai, Ying Cheng

## Correspondence

shangli.cai@brbiotech.com & jl.cheng@163.com

## In brief

- In non-squamous non-small cell lung cancer (nsqNSCLC) with programmed death-ligand 1 (PD-L1) expression on less than 50% of tumor cells, we leveraged clinical and mutational data of multiple cohorts to develop the interaction score for additional chemotherapy (ISAC) to predict the survival benefit from the addition of platinum-doublet chemotherapy to anti-PD-(L)1 in first-line treatment.
- A high ISAC was identified as a significant predictor for virtually no added value of chemotherapy to anti-PD-(L)1 and adaptive immune resistance reflected by more pro-inflammatory rather than anti-inflammatory tumor-infiltrating immune cells and high expression of immune checkpoints except PD-L1 (e.g., PD-1).
- In addition to the PD-L1≥50% nsqNSCLC where anti-PD-(L)1 monotherapy was approved and recommended as first-line therapy, the ISAC can further distinguish nearly half of PD-L1<50% nsqNSCLCs to be exempted from chemotherapy in the first-line setting, thereby reducing undue toxicity and improving quality of life.
